# Supplementary material for: TDDFT Study on the ESIPT Properties of 2-(2′-Hydroxyphenyl)-Benzothiazole and Sensing Mechanism of a Derived Fluorescent Probe for Fluoride Ion
Source: MDPI journal article supplement (doi:10.3390/molecules29071541), 2024-03-29
Supplement: s1 [file s1]

Supporting Information (SI) for:

**TDDFT study on the ESIPT properties of 2-(2'-hydroxyphenyl)-  
benzothiazole and sensing mechanism of a derived fluorescent probe  
for fluoride ion**

**Tingting Wang <sup>1</sup>, Meiheng Lv <sup>1,2,\*</sup>, Yuhang Zhang <sup>1</sup>, Yue Gao <sup>1</sup>, Zexu Cai <sup>1</sup>, Yifan Zhang <sup>1</sup>, Jiaqi Song <sup>1</sup>, Jianyong Liu <sup>2,\*</sup>, Hang Yin <sup>2</sup> and Fangjian Shang <sup>3</sup>**

<sup>1</sup> College of Science, Shenyang University of Chemical Technology, Shenyang 110142, China

<sup>2</sup> Research Center of Advanced Biological Manufacture, Dalian National Laboratory for Clean Energy, Dalian Institute of Chemical Physics, Chinese Academy of Sciences, Dalian 116023, China

<sup>3</sup> College of Aeronautical Engineering, Binzhou University, Binzhou 256603, China

\* Correspondence: mhlv@syuct.edu.cn (M.L.); beam@dicp.ac.cn (J.L.)

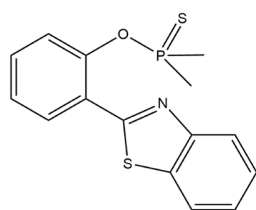

PBT

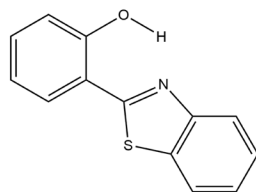

HBT

**Figure. S1** The chemical structures of PBT and HBT.

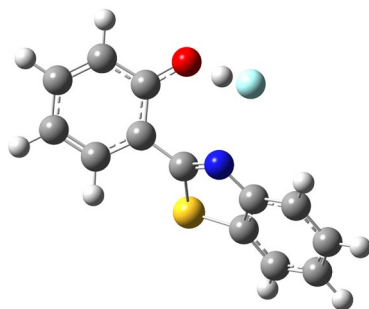

**Figure. S2** The optimized ground state geometrical configuration of HBT-F.

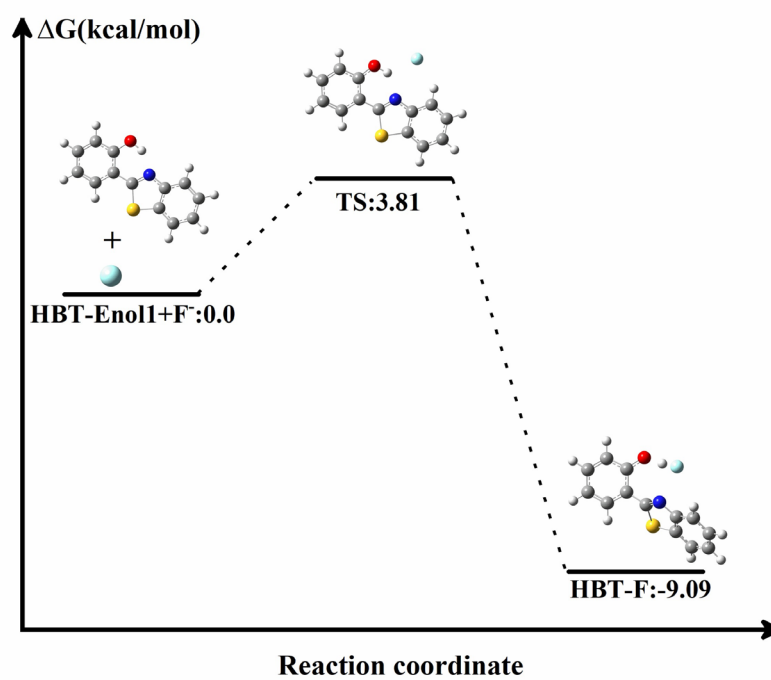

**Figure. S3** Gibbs free energy change (kcal/mol) for the HBT-Enol1+F<sup>-</sup> recognition process.

IM: intermediate, TS: transition state

**Table S1** The natural population analysis of O and N atoms for HBT-Enol1 at the S<sub>0</sub> and S<sub>1</sub> states.

|   | S <sub>0</sub> | S <sub>1</sub> |
|---|----------------|----------------|
| O | -0.662         | -0.656         |
| N | -0.486         | -0.496         |

## Coordinates of PBT

|   |             |             |             |
|---|-------------|-------------|-------------|
| C | -3.70138300 | 2.28023700  | 0.46570200  |
| C | -2.70275000 | 3.20018300  | 0.16137700  |
| C | -1.37921600 | 2.78943400  | 0.11319000  |
| C | -1.01681300 | 1.46017400  | 0.36964200  |
| C | -2.04155700 | 0.54641000  | 0.66674700  |
| C | -3.36779300 | 0.95514700  | 0.71603000  |
| C | 0.39055600  | 1.05767600  | 0.30077500  |
| S | 1.45405900  | 1.82031700  | -0.92008700 |
| C | 2.76529700  | 0.81426600  | -0.33722800 |
| C | 2.29636900  | -0.00069600 | 0.71680600  |
| N | 0.96388000  | 0.16923700  | 1.04445200  |
| C | 4.08502800  | 0.74837600  | -0.77448900 |
| C | 4.93617500  | -0.15147400 | -0.14715200 |
| C | 4.48309900  | -0.96690400 | 0.89943400  |
| C | 3.17039200  | -0.89804300 | 1.33725700  |
| H | -4.73715700 | 2.59030500  | 0.50906800  |
| H | -2.95232400 | 4.23484900  | -0.03187100 |
| H | -0.60339800 | 3.51126000  | -0.10645300 |
| H | -4.12862300 | 0.22245200  | 0.94948100  |
| H | 4.43931600  | 1.37573700  | -1.58118900 |
| H | 5.96586800  | -0.22265200 | -0.47269200 |
| H | 5.16917500  | -1.65889000 | 1.37020000  |
| H | 2.81248300  | -1.52014600 | 2.14711000  |
| O | -1.75791500 | -0.77148500 | 0.95463800  |
| P | -1.52741200 | -1.95488700 | -0.20166800 |
| S | -0.91295800 | -1.29851000 | -1.95870000 |
| C | -0.37304800 | -3.03395400 | 0.68826200  |
| H | -0.77516400 | -3.26887100 | 1.67347100  |
| H | -0.23562300 | -3.94935900 | 0.11475400  |
| H | 0.57415100  | -2.50979300 | 0.78833100  |
| C | -3.14138100 | -2.79503100 | -0.24818200 |
| H | -3.87353300 | -2.12561000 | -0.69700800 |
| H | -3.05452900 | -3.69323800 | -0.85839900 |
| H | -3.44876000 | -3.05922200 | 0.76351200  |

# Coordinates of HA<sup>-</sup>

|   |             |             |             |
|---|-------------|-------------|-------------|
| C | -4.51807000 | -0.26669000 | 0.00011900  |
| C | -3.72867000 | -1.43261700 | 0.00038500  |
| C | -2.35861900 | -1.29592900 | 0.00035800  |
| C | -1.70132000 | -0.04550300 | 0.00006200  |
| C | -2.50023200 | 1.18165700  | -0.00026400 |
| C | -3.93113200 | 0.97289200  | -0.00017800 |
| C | -0.25706200 | -0.02232500 | 0.00006000  |
| S | 0.65413700  | -1.61877200 | -0.00038800 |
| C | 2.15835600  | -0.71819200 | -0.00015000 |
| C | 1.87550000  | 0.66608800  | 0.00022000  |
| N | 0.53884000  | 1.00536400  | 0.00032000  |
| C | 3.46433200  | -1.19426000 | -0.00027500 |
| C | 4.50518100  | -0.27040300 | -0.00003400 |
| C | 4.24080500  | 1.10388400  | 0.00033100  |
| C | 2.93589700  | 1.57772700  | 0.00046000  |
| H | -5.59998100 | -0.34968500 | 0.00015400  |
| H | -4.18485000 | -2.41371300 | 0.00063800  |
| H | -1.75961800 | -2.19970300 | 0.00063000  |
| H | -4.54026900 | 1.87017700  | -0.00037700 |
| H | 3.67081600  | -2.25654500 | -0.00055500 |
| H | 5.52911500  | -0.62152100 | -0.00013100 |
| H | 5.06469400  | 1.80628000  | 0.00051500  |
| H | 2.72449400  | 2.63939400  | 0.00074600  |
| O | -2.03153500 | 2.35626800  | -0.00052600 |

## Coordinates of HA-F

|   |             |             |             |
|---|-------------|-------------|-------------|
| C | 4.47386200  | -0.47583900 | -0.37537900 |
| C | 3.71534700  | -1.65006000 | -0.41196200 |
| C | 2.33719500  | -1.55179800 | -0.31426200 |
| C | 1.69015500  | -0.31423900 | -0.18539900 |
| C | 2.45623500  | 0.89184600  | -0.09393000 |
| C | 3.86273900  | 0.75444000  | -0.22136000 |
| C | 0.22986500  | -0.27791300 | -0.16633000 |
| S | -0.66424100 | -1.43661800 | 0.88246300  |
| C | -2.16548400 | -0.74644700 | 0.29451400  |
| C | -1.87210200 | 0.29147500  | -0.61893500 |
| N | -0.52745500 | 0.51391700  | -0.85227400 |
| C | -3.47716900 | -1.08633700 | 0.61190200  |
| C | -4.50476100 | -0.37060500 | 0.01038800  |
| C | -4.22815300 | 0.66212300  | -0.89538600 |
| C | -2.92124100 | 0.99710200  | -1.21494400 |
| H | 5.55341100  | -0.52761100 | -0.46060500 |
| H | 4.19046300  | -2.61522400 | -0.52737100 |
| H | 1.73211800  | -2.44927500 | -0.37133900 |
| H | 4.45429800  | 1.66085700  | -0.17015900 |
| H | -3.69432100 | -1.88316700 | 1.31074900  |
| H | -5.53230500 | -0.61543800 | 0.24665600  |
| H | -5.04657200 | 1.20494200  | -1.35060600 |
| H | -2.69910800 | 1.79238400  | -1.91463100 |
| O | 1.93791200  | 2.07118700  | 0.11265100  |
| H | 0.91017000  | 2.18828000  | 0.91743600  |
| F | 0.15218600  | 2.36896800  | 1.63907500  |



### Coordinates of HBT-Enol1

|   |             |             |             |
|---|-------------|-------------|-------------|
| C | 4.50546800  | -0.09715000 | -0.00006400 |
| C | 3.84139800  | -1.32692500 | -0.00019900 |
| C | 2.46012700  | -1.35044400 | -0.00020900 |
| C | 1.70710400  | -0.16532400 | -0.00010600 |
| C | 2.39399500  | 1.07486000  | 0.00005500  |
| C | 3.79120200  | 1.08825900  | 0.00008500  |
| C | 0.25584400  | -0.18610200 | -0.00021500 |
| S | -0.68092900 | -1.70143300 | 0.00022200  |
| C | -2.15501000 | -0.74328400 | 0.00006600  |
| C | -1.82981400 | 0.62886900  | -0.00015800 |
| N | -0.47441500 | 0.89588600  | -0.00022700 |
| C | -3.47647200 | -1.17635300 | 0.00018700  |
| C | -4.47757600 | -0.21355000 | 0.00005000  |
| C | -4.16622300 | 1.15278600  | -0.00017100 |
| C | -2.84911300 | 1.58382200  | -0.00024100 |
| H | 5.58759600  | -0.06656300 | 0.00002000  |
| H | 4.40078400  | -2.25240000 | -0.00033000 |
| H | 1.94563700  | -2.30334100 | -0.00029400 |
| H | 4.29509300  | 2.04590600  | 0.00013500  |
| H | -3.72054300 | -2.23001400 | 0.00037800  |
| H | -5.51358500 | -0.52612900 | 0.00011800  |
| H | -4.96665900 | 1.88098800  | -0.00025000 |
| H | -2.59905800 | 2.63646500  | -0.00040200 |
| O | 1.75090200  | 2.25928300  | 0.00046100  |
| H | 0.77371100  | 2.07576100  | 0.00050000  |

## Coordinates of HBT-Enol2

|   |             |             |             |
|---|-------------|-------------|-------------|
| C | -4.50065300 | -0.27474200 | 0.00021800  |
| C | -3.73663600 | -1.43962000 | 0.00063300  |
| C | -2.35775100 | -1.34231300 | 0.00058600  |
| C | -1.68747000 | -0.10650900 | 0.00012500  |
| C | -2.48125000 | 1.06310900  | -0.00031700 |
| C | -3.87474900 | 0.95993400  | -0.00024400 |
| C | -0.22485900 | -0.07959300 | 0.00010200  |
| S | 0.68216300  | -1.64340900 | -0.00064700 |
| C | 2.17497200  | -0.72776300 | -0.00028100 |
| C | 1.87863800  | 0.65214600  | 0.00041800  |
| N | 0.53398300  | 0.96857300  | 0.00061100  |
| C | 3.48693500  | -1.19104800 | -0.00055800 |
| C | 4.51076900  | -0.25244700 | -0.00013500 |
| C | 4.23127200  | 1.12100000  | 0.00056100  |
| C | 2.92382300  | 1.58063300  | 0.00083900  |
| H | -5.58167300 | -0.32635200 | 0.00026300  |
| H | -4.21144900 | -2.41116800 | 0.00100900  |
| H | -1.77693000 | -2.25514800 | 0.00097900  |
| H | -4.46523800 | 1.86903300  | -0.00058000 |
| H | 3.70666400  | -2.25025300 | -0.00108400 |
| H | 5.53934800  | -0.58922100 | -0.00034100 |
| H | 5.04842200  | 1.83061500  | 0.00088300  |
| H | 2.69778600  | 2.63887400  | 0.00137600  |
| O | -1.88717000 | 2.28311500  | -0.00086200 |
| H | -2.57031900 | 2.96652600  | -0.00121500 |

### Coordinates of HBT-Keto

|   |             |             |             |
|---|-------------|-------------|-------------|
| C | 4.50496600  | -0.01415300 | 0.00054600  |
| C | 3.88253800  | -1.28358300 | -0.00006900 |
| C | 2.51406900  | -1.35408600 | -0.00056100 |
| C | 1.71846900  | -0.18408900 | -0.00054100 |
| C | 2.33968700  | 1.13166200  | 0.00007700  |
| C | 3.77095700  | 1.14398300  | 0.00071700  |
| C | 0.30613700  | -0.25571800 | -0.00058600 |
| S | -0.67076800 | -1.71870400 | 0.00003900  |
| C | -2.14472100 | -0.73910900 | 0.00026800  |
| C | -1.82647400 | 0.62676700  | -0.00010600 |
| N | -0.45958800 | 0.83716200  | -0.00069400 |
| C | -3.46509600 | -1.16794600 | 0.00053700  |
| C | -4.46424300 | -0.20125400 | 0.00045100  |
| C | -4.14816100 | 1.16157400  | 0.00002700  |
| C | -2.82879600 | 1.59230200  | -0.00032800 |
| H | 5.58732100  | 0.04303300  | 0.00100200  |
| H | 4.48053000  | -2.18451500 | -0.00031200 |
| H | 2.02740700  | -2.32284600 | -0.00103800 |
| H | 4.25652800  | 2.11198900  | 0.00115600  |
| H | -3.71042600 | -2.22100700 | 0.00076500  |
| H | -5.50078800 | -0.51072800 | 0.00072100  |
| H | -4.94444000 | 1.89384300  | -0.00007000 |
| H | -2.57837600 | 2.64433000  | -0.00074600 |
| O | 1.65939700  | 2.21472200  | 0.00007700  |
| H | 0.10048200  | 1.72914800  | -0.00044600 |
